# Supplementary material for: Identification and Characterization of the Gene Responsible for the O3 Mating Type Substance in Paramecium caudatum
Source: Microorganisms. 2024 Mar 15;12(3):588. doi: 10.3390/microorganisms12030588 (PMC10974281; doi:10.3390/microorganisms12030588)
Supplement: Supplementary file 1 [file microorganisms-12-00588-s001.zip › Supplementary Figure S1.pdf]

**Figure s1.** Multiple amino acid sequence alignment of O<sup>3</sup>Pc-MSP with 14 homologous proteins. The NCBI accession number for each protein is listed next to the respective species name. Outlined letters denote amino acid residues that are at least 80% identical (dark shade) or chemically similar (light shade). The letters written under the alignment represent highly conserved residues among these proteins.

|                              |   |                                                                                                                                                                                       |    |
|------------------------------|---|---------------------------------------------------------------------------------------------------------------------------------------------------------------------------------------|----|
| c-MSP_AHW46386               | 1 |                                                                                                                                                                                       | 0  |
| _primaurelia_CAD8047831.1    | 1 |                                                                                                                                                                                       | 0  |
| _octaurelia_CAD8144385.1     | 1 |                                                                                                                                                                                       | 0  |
| _pentaurelia_CAD8141516.1    | 1 |                                                                                                                                                                                       | 0  |
| _tetraurelia_XP_001425958.1  | 1 |                                                                                                                                                                                       | 0  |
| _thermophila__XP_001022919.3 | 1 | MGNQCCQGNSPGEDKNTISMGNKDFNVNSVQGSSKNMHNDKEKPREEESTRQLKEKYGKSIVSHNSKDQYQDGGDRLVGSQTNNVAYEEQVSNHDKAIDKQASHQYGSSQREIQQGKEEAQKQS SKTGS QLN LKGQQAA                                        | 13 |
| _multifiliis_XP_004030361.1  | 1 |                                                                                                                                                                                       | 0  |
| _persalinus_KRX00690.1       | 1 |                                                                                                                                                                                       | 0  |
| _coeruleus_OMJ82598.1        | 1 |                                                                                                                                                                                       | 0  |
| _stoltei_CAG9334218.1        | 1 |                                                                                                                                                                                       | 0  |
| _cerevisiae_CAA40928.1       | 1 |                                                                                                                                                                                       | 0  |
| _melanogaster_NP_726571.2    | 1 |                                                                                                                                                                                       | 0  |
| _elegans_NP_001366992.1      | 1 |                                                                                                                                                                                       | 0  |
| _musculus_AAHS56929.1        | 1 | MGKEPLTLKSIQLAMEELYPKNRALALAPHSRVPSPRLRSRLPSKLLKGSHRCGEAGSYSAEMESKAVSRHQGKTSTVLAPEDKARAQKWVRGKQESEPPGPPSPGAATQEETHASGEKHLGVEIEKTSGEIVRCEKCKRRERELQLGLQREPCLGTSELDLGRAQKR DSEKLVRTKSCR | 18 |
| _sapiens_KAI2521286.1        | 1 |                                                                                                                                                                                       | 0  |

|                            |     |                                                                                                                                                                                                            |    |
|----------------------------|-----|------------------------------------------------------------------------------------------------------------------------------------------------------------------------------------------------------------|----|
| c-MSP_AHW46386             | 1   | MGACGG-----KSD-SKEQTKTKEQK-----QLAINKFEVGPNI FVNLLKQGD-----ITDNYL I Q K L G E C - Y G V R L V                                                                                                              | 62 |
| primaurelia_CAD8047831.1   | 1   | MGACGG-----KSG-DKQQQMSKEQK-----QLAVNKFVEVGPNI FVNLLKQGD-----ITDTYI I N K I L G E G S Y G Q V R L V                                                                                                         | 63 |
| octaurelia_CAD8144385.1    | 1   | MGACGG-----KSGGDKQQSMSKEQK-----QLAVNKFVEVGPNI FVNLLKQGD-----ITDTYI I N K I L G E G S Y G Q V R L V                                                                                                         | 64 |
| pentaurelia_CAD8141516.1   | 1   | MGACGG-----KSG-DKQQQMSKEQK-----QLAVNKFVEVGPNI FVNLLKQGD-----ITDTYI I N K I L G E G S Y G Q V R L V                                                                                                         | 63 |
| tetraurelia_XP_001425958.1 | 1   | MGACGG-----KSGGDKQQAMSKEQK-----QLAVNKFVEVGPNI FVNLLKQGD-----ITDTYI I N K I L G E G S Y G Q V R L V                                                                                                         | 64 |
| thermophila_XP_001022919.3 | 140 | TSTTTNTKSTS AETHASESNGVT KDGFKESTNNGSAQPIAKQASSGKQSSSQSQKEQKSSSGDQQPASSSKHGLQRLSNAGLP PAPSTNQAKQKKESQSVDakkATEDDkskKSSPSISKSPQRPPAKNSAVDFNISADSFIHLKKGS-----ITQYYK I G E V L G E G A F G V S K V           | 30 |
| multifiliis_XP_004030361.1 | 1   | MSCMSEFSISPDIF IHLKGQT-----IQQNYKTGEI L G E G A F G L V C K V                                                                                                                                              | 43 |
| persalinus_KRX00690.1      | 1   | MGCCQSEQNKEEVYTEQNIE NQNKINAQKNANVKQSSAQQEDQQNP IQSHANQAQEKE----KNDQGI SQSNQQQEP AQKREDE-----HKENKKEIVVSNKHKS NVKNSSSS-----LLEQYT I G K V L G E G G F G T V C L V                                          | 12 |
| coeruleus_OMJ82598.1       | 1   | MGCIPN-----KNRPI AKITNQVNNAP-----ISP EGKKEEIKIDQGMF IGKRKGN-----IKDKYI I G N K I G S G A F G F V R V I                                                                                                     | 68 |
| stoltei_CAG9334218.1       | 1   | MEELKVSQSD FVV ENQGK-----LRDTYR I G S K L G D G A F G S V R K I                                                                                                                                            | 40 |
| cerevisiae_CAA40928.1      | 1   | MDDKVSEKES SPKQTEEDSEGMAHVQP ASYV-----NKKKYVF GKT L G A G T F G V V R V R                                                                                                                                  | 54 |
| melanogaster_NP_726571.2   | 1   | MPLFGKKDSGKKAKAKDLK----ELNKQVS-----IEEKYNLHGL LGTGAFSEVRLA                                                                                                                                                 | 48 |
| elegans_NP_001366992.1     | 1   | MMNSTATK-----FSDNYDVKEEL GKGA FS VVRRC                                                                                                                                                                     | 29 |
| musculus_AAH56929.1        | 181 | R P SEAKSTDGEEGWKGD SHRGSPRPDPQELRRPN SNSDKKEIRGESQDSHPQGAPKAQKDLVEGPPAVEEGPIDMRREDRHTCRSKHA AWLRR EQQAEP PQLPRTRGEEKQAEHEKKPGGLGERRAPEKESKRKLEEKRPERPSGRKPRPKGI ISADVEKH YDI GG V I G D G N F A T V K E C | 36 |
| sapiens_KAI2521286.1       | 1   | MGRKE-----EDDCS----SWKKQT TN-----IRKTF IFMEVL GS GA FSEVFLV                                                                                                                                                | 40 |
|                            |     | -----Y-----LG-----V-----                                                                                                                                                                                   |    |

|                                   |     |                                                                           |                                                                      |                     |           |              |                      |          |        |     |
|-----------------------------------|-----|---------------------------------------------------------------------------|----------------------------------------------------------------------|---------------------|-----------|--------------|----------------------|----------|--------|-----|
| c-MSP_AHW46386                    | 63  | THK-KTNQLRAMKQIQKKKILKEQ--EDAMFSEVALLKDMDDHQNIVKLFELYQDSQNYIVTEYLN        | GGELLDKLTCLTTFNERTAAAYMKQVLSALAYCHAQNTIHRDMKPSNIMLQ-SPDPKAGIKVIDFG   | TAKKQVS             | GE-KQTQVI | GTPLY        | YIAPEVIDKQ-YTEKCDIWS | SGVILY   | QI     | 236 |
| <i>primaurelia_CAD8047831.1</i>   | 64  | QHK-KTGGQARMKQIQKKKILKEQ--EDAMFSEVALLKDMDDHQNIVKLFELYQDSQNYIVTEYLN        | GGELLDKLTCLTTFNERTAAAYMKQVLSALAYCHAQNTIHRDMKPSNIMLA-SPDPKSPIKVIDFG   | TAKKQVS             | GE-SQTQVI | GTPLY        | YIAPEVIDKN-YTEKCDIWS | SGVILY   | QI     | 237 |
| <i>octaurelia_CAD8144385.1</i>    | 65  | QHK-KTGGQARMKQIQKKKILKEQ--EDAMFSEVALLKDMDDHQNIVKLFELYQDSQNYIVTEYLN        | GGELLDKLTCLTTFNERTAAAYMKQVLSALAYCHAQNTIHRDMKPSNIMLA-SPDPKSPIKVIDFG   | TAKKQVS             | GE-SQTQVI | GTPLY        | YIAPEVIDKN-YTEKCDIWS | SGVILY   | QI     | 238 |
| <i>pentaurelia_CAD8145156.1</i>   | 64  | QHK-KTGGQARMKQIQKKKILKEQ--EDAMFSEVALLKDMDDHQNIVKLFELYQDSQNYIVTEYLN        | GGELLDKLTCLTTFNERTAAAYMKQVLSALAYCHAQNTIHRDMKPSNIMLA-SPDPKSPIKVIDFG   | TAKKQVS             | GE-SQTQVI | GTPLY        | YIAPEVIDKN-YTEKCDIWS | SGVILY   | QI     | 239 |
| <i>tetraurelia_XP_001425958.1</i> | 65  | QHK-KTGGQARMKQIQKKKILKEQ--EDAMFSEVALLKDMDDHQNIVKLFELYQDSQNYIVTEYLN        | GGELLDKLTCLTTFNERTAAAYMKQVLSALAYCHAQNTIHRDMKPSNIMLA-SPDPKSPIKVIDFG   | TAKKQVS             | GE-SQTQVI | GTPLY        | YIAPEVIDKN-YTEKCDIWS | SGVILY   | QI     | 240 |
| <i>thermophila_XP_001022919.3</i> | 309 | VHK-STGMIRAMKTIKKSSVKEE--EDRLFSEMNILKNLDHHPNIIKLIELFQDSKNYIVTEYCS         | GGELFDKIKSMTHFTEKMAADYMKQVLSAVVYCHQNNIVHRDLKPENLLFD-SDKKNANLKVIDFG   | TSRKIDENK-KMSKRL    | GTPY      | YIAPEVL      | LDQN-YDEKCDVWS       | SGVILY   | IL     | 248 |
| <i>multifiliis_XP_004030361.1</i> | 44  | THK-NTGMVIRAMKTIKKSSVKEE--EERLFSEMNILKNLDHHPNIIKLIELFQDSKNYIVTEYCS        | GGELFDKIKSMKNFTEKMAADYMKQVLSAVVYCHQNNIVHRDLKPENLLFD-TDKKDANLKVIDFG   | TSRKIDENK-KMSKRL    | GTPY      | YIAPEVL      | LDQN-YDEKCDVWS       | SGVILY   | IL     | 217 |
| <i>persalinus_KRX00690.1</i>      | 127 | THK-ATGIVIRAMKTIKKMKMQNE--EDRLFSELAAILRDIDHHPNIIKVFIEHFQDEKYYLISEYCT      | GGELFERIKEISPFTEKVAALYMKQVLSAIAYCHINNICHRDLPENLLFD-TKQSNANLKVIDFG    | ASTKQFDPSC-KLTKR    | GTPF      | YVAPETL      | SKLPYDEKCDVWS        | SLGVIM   | IM     | 307 |
| <i>cortuleus_KJ82598.1</i>        | 74  | THK-TSGQKRAIKTIQKESITKDMKEHSFFNEVDILIKADHHPNIIKTYEWEDEKYYLIVTEFVS         | GGELFDKIKSRMSEPIAAHFMKQVLSAVAYCHANSIVHRDLKPENLLFD-KDSADSLKVIDFG      | TSKIYDTGS-KMTQKY    | GTPY      | YIAPEVL      | LRD-YTEKCDVWS        | SGVILY   | IL     | 241 |
| <i>stoltei_CAG9334218.1</i>       | 41  | THR-VTGEIRAVKTHKKTLRTEE-ERQTFNEVSVLRALDHHPNIIKLIEYEFQDEKYYLITELCS         | GGELFDRIINNGSFSEATAAEYLROIIVSLVAYCHERNVIVHRDLKPENLLFD-TTDPDANLKVIDFG | TAQFFRPGE-ILTQKF    | GTPY      | YIAPEVL      | LRKH-YDEKCDVWS       | SGVILY   | IF     | 217 |
| <i>cerevisiae_CAA04928.1</i>      | 55  | KNT-ETGEDVAVKIVIKKALKGNKVQLEALYDELDIRLRLHHPNIIAFKDWFEKSKDKFIITQLAK        | GGELFDRIKKGKFEEDAVRILVEIIVSAVKYMHSGNIVHRDLKPENLLYI-DKSDDESLPVVA      | IAKTLKSDDELLYKAGTAL | GV        | YVAPETL      | QDGHGKPCDIWS         | ISGVIT   | TYTL   | 222 |
| <i>melanogaster_NP_726571.2</i>   | 49  | ESKDSPGEHFAVKKIKKKALKGK--EESLENIRVLRRLTHHPNIIIVLTETEDKSKVYLVMLVLT         | GGELFDRIVEKGSYTEKDAASHLROIIVLEADVYHSEGGVIVHRDLKPENLLYI-SPDDSKIMIS    | SKLMDSG--IMATAC     | GTPG      | YVAPETL      | LAQKPYGKAVDWS        | ISGVIS   | YL     | 223 |
| <i>elegans_NP_001366992.1</i>     | 30  | VHK-TGLFEAAKIIINTKLSARD--FQKLEREARICRKLQHPNIIIVLRHDSIQEESFHYLVFDLVT       | GGELFEDIAREFYSADASHCIQIIVLESIAAYCHSNGIVHRDLKPENLLA-SKAKGAAYKLAD      | LAIEVNDSE-AWHGFAGT  | PG        | YLSPEVL      | LKDPYKPVDIWAC        | GVILY    | IL     | 207 |
| <i>musculus_AAH56929.1</i>        | 361 | RHR-ETKQAYAMKIIKDSQKLGKE--DIVDSEILIIQSLSHHPNIIIVLKHVEYETEAEIYIMAYVQ       | GGELFDIAIVENVKFEPEAAVMITDLCKALVHMHDKNIVHRDLKPENLLVQRNEDKSITLKLAD     | GLAKYVVRP---IFTVC   | GTP       | YVAPETL      | SEKGYGLEVDW          | MAAGVILY | IL     | 537 |
| <i>sapiens_KA12521286.1</i>       | 41  | KQR-LTGKLFALKCIKK-SPAFR--DSSLENEIIVLKKIKHENIVLTEDIYESTTHYYLVMLQVS         | GGELFDRIERGVTYEKDAASLVIQIIVSAVKYMHSEGGVIVHRDLKPENLLYI-TPEENSKIMIS    | LSKMEQNG--IMSTAC    | GTPG      | YVAPETL      | LAQKPYKSAVDWS        | ISGVIT   | YL     | 217 |
|                                   |     | H.-TGAKAKIK--E.-L.HNIVLE.-YL.EGGELD.-E.A.Q.L.A.Y.H.-I.HRD.KP.N.-.-K.-D.FG |                                                                      |                     |           | GTPY.APEV.-Y |                      | D.WS     | GVIY.- |     |

-MSP\_AHW46386 237 LTGKFPFDVKVQSLQQLFSNIKSGK-YNFNSKEFTSLSFEAQNLKSMQLQDPKKRPSASEILNDPWIKEKAR----EDKISLDVMSDLGKFHNESNMRAAILQMIAGQMMSSEETEQLTQTFSSMDKNKDGQLSKEEMYAAYTQVFND-----ELKAKHLVDEIFQKVDSSNNSGKIS 40  
 -primaurelia\_CAD8047831.1 238 LTGKFPFDVKVQSLQQLFANIKSGK-YNFNSKEFTSLSFEAQTLKSMQLQDPKKRPSASEILNDPWIKEKAK----EDKISLDVMSDLGKFHNESNMRAAILQMIAGEMMSNEEKDQLNQTFQSMDKNKGDLSSKEELIQAYTQVFND-----ELKAKHLVEEIFTQIDQNNSGKIS 40  
 -octaurelia\_CAD8144385.1 239 LTGKFPFDVKVQSLQQLFSNIKSGK-YNFNSKEFTSLSFEAQNLKSMQLQDPKKRPSASEILNDPWIKEKAK----EDKISLDVMDLGLKFHNESNMRAAILQLIAGEMMTNEEKDQLNQTFQSMDKNKGDLSSKEELVQAYTQVFND-----ELKAKHLVEDIFKQIDQNNSGKIS 40  
 -pentaurelia\_CAD8141516.1 238 LTGKFPFDVKVQSLQQLFANIKSGK-YNFNSKEFTSLSFEAQTLKSMQLQDPKKRPSASEILNDPWIKEKAK----EDKISLDVMSDLGKFHNESNMRAAILQMIAGEMMSNEEKDQLNQTFQSMDKNKGDLSSKEELIQAYTQVFND-----ELKAKHLVEEIFTQIDQNNSGKIS 40  
 -tetraurelia\_XP\_001425958.1 239 LTGKFPFDVKVQSLQQLFNNIKSGK-YNFNSKEFTSLSFEAQNLKSMQLQDPKKRPSASEILNDPWIKEKAK----EDKISLDVMDLGLKFHNESNMRAAILQLIAGEMMTNEEKDQLNQTFQSMDKNKGDLSSKEELVQAYSQVFND-----ELKAKHLVEDIFTQIDQNNSGKIS 40  
 -thermophila\_XP\_001022919.3 483 LCGYPFFGGRSE--DEILKKVRLGK-FKFEPEWDWRISEEAKNLIKMLTYDPKKRISAEQALNDWVQKNAP----ANHISTRALSNSNFYTRSKIKQALITTFIVSQVSDQKEELQKTFRLDKNGDGLSKEELIDGYTTVLGD-----KEKAATQVDRILDVEVDINKSGKVD 64  
 -multifiliis\_XP\_004030361.1 218 LCGYPFFTGKNE--DEILKKVRLGK-FKFDPEWDWNI SEDAKNLIKMLTYDSKKRISALQALNDWVQKNAP----AIPVNKTLQNLNFSQSRSKIQALIMTYIVSQMITQEQEKELQKNFMSLDQNGDGLSKDELIQGYTSVCGN-----KELAIQVERILDIVDCNKSGKVD 38  
 -persalinus\_KRX00690.1 302 LCGYPFFWGQND--REIYDKVKKGK-YEFSEEDWDHISEDAKDLINKMLKYSPAEIRIATEAYAHVQSNVF--VEPLDGKMMKKLSTFDKANKIRVSI LSMMANQVSSAEKENLIKNFQAI DTNGDGLSSQELIEGYTKVIGD-----PLKAKDIVDKTFGDLDDHDGSGKVD 46  
 -coeruleus\_OMJ82598.1 245 LSGKPPFYGRTD--REILERYQRGQ-YSMDDQEWGRVSLPAKNLKMMIQLINFSRISSDQALDKHWITNNTLNS-FRESDIQTETLSLNAKFRTEQKLQKAVLTFISSQLISKDEAKKLAENFKRLDKNGDGLSREELLEAYKSQLG-----YEAALLEVEKIMQVQVSSN SGFID 41  
 -stoltei\_CAG9334218.1 216 LAGYPPFEGGNTD--EQLRKVSTGR-FSPSPSEWDSISFEAKDLISKMLTIEPGRRVRSARLALRHPMSNAPRPV-IN-PALARTIFSNLQNFRAGRSLQKATTFSSIASQLSTKEEKEEMLSLFKSLDTONSGTLISRAELIEGYTMYLGNQ-----IDDIQGEVERIMSVQVDTDKSGEID 38  
 -cerevisiae\_CAA04928.1 233 LCGYATIDRKVQ--DFLDECTTGEYPVKFHRPYWDSVSNQAKFILLKALNLDPSKRPYTAELLEDPWITCTELKTHNLLPGLKEGLDARQKFRNSVERVRLNMKIQLRDLYLEQTESDSDFDEGSQANGSVPLIATDTSQLSKKLSSEE-----EQSKLKSELSKAF 39  
 -melanogaster\_NP\_726571.2 223 LCGYPFFYDEND--ANLFAQILKAG-FFEDSPYWDIESAKHFIKMLMCTVTEKRYTCKQALGHAWISGNEASSRNIGHTVSEQLKKNFAKSRWKQAYYATVIRMQRMALNSNS-----NANFDSNSSNSN-----QDSTPTTAAITG--- 35  
 -elegans\_NP\_001366992.1 205 LVGYPPFWDEDQ--HRLYAQIKAGA-YDYPSPEWDTVPEAKSLIDSMQTVNPKKRIADQALKVPVICNRER--VASAIHRQDVTCLCKKFNARKKLKGLATTTMIATRNL-----LSNLGRNLNKKEGGGPPSTIKESS-----ESSQITDDNDSSEKNGE 35  
 -musculus\_AAH56929.1 534 LCGFPFRSPERDQDELFNIIQVQG-FEFLSPYWDNISDAKDLVRLNLEVDPKKRYTAEQVLOHPVIMVGH-----TNTGNSQKEESPNS----- 61  
 -sapiens\_KAI2521286.1 213 LCGYPFFYEETE--SKLFEKIKEGY-YEFESPFWDDISEAKDFICHLLEKDDNEBYICEKALSHSPWIDGNTALHRDIYPSVSLQIQKNFAKSKWRQAFNAAVVHHMRKLHMNLHSPGIRPEVENRPPETQASSETSRRPSSPEITITEAPVLDSVALPALTLQLPCQHGRRPPTAPGGRSL 38

|                             |     |                                                                                            |     |
|-----------------------------|-----|--------------------------------------------------------------------------------------------|-----|
| c-MSP_AHW46386              | 405 | YTEFLVASAKQNTLLSKTKIDQAFKMFDDKDGNGVISRQELQDIMCG-VDMENQNWNQIIGQCCKNGDGNIQYEEFAQMLLQTAKK     | 488 |
| _primaurelia_CAD8047831.1   | 406 | YTEFLVASAKQNTILSKTKIDQAFKMFDDKDGNGQITKQELQDIMCG-VDIDNTQWAQIIAQCDKNGDGI IQYDEFANMLLQTAKK    | 489 |
| _octaurelia_CAD8144385.1    | 407 | YTEFLVASAKQNTILSKTKIDQAFKMFDDKDGNGQISQELQDIMCG-VDIDNAQWGQIIAQCDKNGDGI IQYDEFANMLLQTAKK     | 490 |
| _pentaurelia_CAD8141516.1   | 406 | YTEFLVASAKQNTILSKTKIDQAFKMFDDKDGNGQITKQELQDIMCG-VDIDNTQWAQIIAQCDKNGDGI IQYDEFANMLLQTAKK    | 489 |
| _tetraurelia_XP_001425958.1 | 407 | YTEFLVASSKQNTILSKTKIDQAFKMFDDKDGNGQITKQELQDIMCG-VDIDNAQWGQIIAQCDKNGDGI IQYDEFANMLLQTAKK    | 490 |
| _thermophila_XP_001022919.3 | 649 | FTEFLMAASNKEILLKAKVEQSIFDQDGNNGNITKDELQYIMGD-IPD--EFWKQILDECDTNKGDMISQTEFLDLLINKKGMPSSQH   | 734 |
| _multifiliis_XP_004030361.1 | 384 | FTEFLMAATNKDVVL SKQKMEQAFKIFDQDGNNGNISREELSYIMGD-IQD--TFWQEILLECDTNKDGKISQNEFIELLLKKNF     | 464 |
| _persalinus_KRX00690.1      | 468 | FSEFMVASLQKEKLF SKDKIDAAFKLIDEDGNGQITKQELDEMGG-FDQD-EVWNQLLQEVNQNGDGMINYKEFIDLVLVKTIEKEGLM | 554 |
| _coeruleus_OMJ82598.1       | 414 | YSEFLIASAQKDVLLSKNNLDNAFAKAFDSDGSGKISAAELKELLNGGYGNDPLWNELIREVDQNGDGEIDLSEFKEMMMKLI AKG    | 499 |
| _stoltei_CAG9334218.1       | 386 | YTEFLAATLNKNRLLSRERLEAAAFRAFDLDSGTITAEELKVL LGKHNTYDEDMWQEVNNEVDLNGDGVIDLREFTTEMLKHT       | 468 |
| _cerevisiae_CAA40928.1      | 395 | AQLVNTVLAEEKFLNINR-----VCSSDSDLPGSDIKSLDEAKEK-----PEGKDTKTEE                               | 445 |
| _melanogaster_NP_726571.2   | 359 | -----AWTSNVLSSSQ-----SVQSHAQEMNK-----SGGSTNAASQ                                            | 390 |
| _elegans_NP_001366992.1     | 351 |                                                                                            | 350 |
| _musculus_AAH56929.1        | 620 |                                                                                            | 619 |
| _sapiens_KA12521286.1       | 390 | NCLVNGSLHISSSLVPMHQGSLAAGPCGCCSSCLNIGSKGKSSYCSEPTLLKKANKKQNFKSEVMVPVKASGSSSHCRAGQTGVCLIM   | 476 |
